# Supplementary material for: Combinatorial Modeling of Chromatin Features Quantitatively Predicts DNA Replication Timing in Drosophila
Source: PubMed Central journal article supplement (PMC3900380; doi:10.1371/journal.pcbi.1003419), 2014-01-23
Supplement: pcbi.1003419.s013.pdf [file pcbi.1003419.s013.pdf]

Supporting Information for:  
Combinatorial modeling of chromatin features quantitatively predicts  
DNA replication timing in *Drosophila*

Table S1

Federico Comoglio and Renato Paro

| Chromatin features        | Lasso | MARS | Lasso<br>(Schwaiger et al.) |
|---------------------------|-------|------|-----------------------------|
| HMs <sup>2</sup>          | 0.69  | 0.68 | 0.64                        |
| HMs <sup>2</sup> +CBP     | 0.72  | 0.70 | 0.67                        |
| (HMs + CBPs) <sup>2</sup> | 0.74  | 0.73 | 0.69                        |

## References

- [1] Schwaiger,M., Stadler,M.B., Bell,O., Kohler,H., Oakeley,E.J. and Schubeler,D. (2009) Chromatin state marks cell-type- and gender-specific replication of the *Drosophila* genome. *Genes Dev.*, **23**, 589-601.
