# Supplementary material for: Combinatorial Modeling of Chromatin Features Quantitatively Predicts DNA Replication Timing in Drosophila
Source: PubMed Central journal article supplement (PMC3900380; doi:10.1371/journal.pcbi.1003419), 2014-01-23
Supplement: pcbi.1003419.s014.pdf [file pcbi.1003419.s014.pdf]

Supporting Information for:  
Combinatorial modeling of chromatin features quantitatively predicts  
DNA replication timing in *Drosophila*

Table S2

Federico Comoglio and Renato Paro

| Flybase name                                     | Symbol  | Source    | Identifier               |
|--------------------------------------------------|---------|-----------|--------------------------|
| Argonaute 2                                      | AGO2    | SRA       | SRP002788                |
| absent, small, or homeotic discs, C-ter domain 1 | Ash1C   | GEO       | GSE30820 [1]             |
| absent, small, or homeotic discs, N-ter domain 1 | Ash1N   | GEO       | GSE30820 [1]             |
| Boundary element-associated factor of 32 kDa     | BEAF    | modENCODE | modENCODE_274            |
| blanks                                           | CG10630 | modENCODE | modENCODE_4176           |
| Chromator                                        | Chro    | modENCODE | modENCODE_278            |
| Centrosomal protein of 190 kDa                   | CP190   | modENCODE | modENCODE_925            |
| CCCTC-binding factor                             | CTCF    | modENCODE | modENCODE_283            |
| dMi-2                                            | dMi-2   | modENCODE | modENCODE_3676           |
| Sex combs extra                                  | dRING   | modENCODE | modENCODE_928            |
| Scm-related gene containing four mbt domains     | dSFMBT  | modENCODE | modENCODE_3751           |
| Utx                                              | dUTX    | SRA       | SRR585048 [5]            |
| Su(Tpl)                                          | ELL     | SRA       | SRR345566 [6]            |
| Enhancer of Zeste                                | E(z)    | modENCODE | modENCODE_2988           |
| female sterile (1) homeotic L                    | FshL    | GEO       | GSE30820 [1]             |
| female sterile (1) homeotic SL                   | FshSL   | GEO       | GSE30820 [1]             |
| FK506-binding protein 2                          | fkbp    | in-house  | †                        |
| Suppressor of variegation 205                    | HP1a    | modENCODE | modENCODE_2668           |
| Heterochromatin Protein 1b                       | HP1b    | modENCODE | modENCODE_941            |
| Heterochromatin Protein 1c                       | HP1c    | modENCODE | modENCODE_943            |
| rhino                                            | HP1d    | modENCODE | modENCODE_4187           |
| Heterochromatin Protein 2                        | HP2     | modENCODE | modENCODE_944            |
| Heterochromatin Protein 4                        | HP4     | modENCODE | modENCODE_3948           |
| Heat shock factor                                | HSF     | SRA       | SRX018631 [7]            |
| Heat shock protein 83                            | Hsp90   | GEO       | GSE31226 [2]             |
| Imitation SWI                                    | ISWI    | modENCODE | modENCODE_3032           |
| Interacts with the C terminus of ELL 1           | Ice1    | SRA       | SRR345567 [6]            |
| Suppressor of variegation 3-1                    | JIL-1   | modENCODE | modENCODE_945            |
| Lysine (K)-specific demethylase 2                | Kdm2    | modENCODE | modENCODE_3033           |
| Histone demethylase 4A                           | Kdm4A   | modENCODE | modENCODE_3784           |
| lilliputian                                      | Lilli   | SRA       | SRR345568 [6]            |
| lost PHD finger of Trr                           | LPT     | SRA       | SRR585049 [5]            |
| MBD-R2                                           | MBD-R2  | modENCODE | modENCODE_946            |
| Minichromosome maintenance complex component 2-7 | MCM     | SRA       | SRP006146                |
| maleless                                         | MLE     | modENCODE | modENCODE_3788           |
| modifier of mdg4                                 | MOD2.2  | modENCODE | modENCODE_2674           |
| males absent on the first                        | MOF     | SRA       | SRR495372, SRR495373 [8] |
| MRG15                                            | MRG15   | modENCODE | modENCODE_3047           |
| male-specific lethal 1                           | MSL1    | modENCODE | modENCODE_3293           |
| male-specific lethal 2                           | MSL2    | SRA       | SRR495368, SRR495369 [8] |
| male-specific lethal 3                           | MSL3    | SRA       | SRR495370, SRR495371 [8] |
| Enhancer of bithorax                             | NURF    | modENCODE | modENCODE_947            |

Continued on next page

**Table S2 – continued from previous page**

| Flybase name                         | Symbol     | Source    | Identifier               |
|--------------------------------------|------------|-----------|--------------------------|
| Origin Recognition Complex subunit 2 | ORC2       | SRA       | SRP002091                |
| Polycomb                             | Pc         | GEO       | GSE24521 [3]             |
| Polycomblike                         | PCL        | modENCODE | modENCODE_3049           |
| Polyhomeotic                         | Ph         | GEO       | GSE24521 [3]             |
| pleiohomeotic                        | Pho        | modENCODE | modENCODE_3894           |
| Painting of fourth                   | POF        | modENCODE | modENCODE_3294           |
| RNA polymerase II 215kD subunit II   | PoliICC*   | modENCODE | modENCODE_329            |
| Rrp6                                 | Rrp6       | SRA       | SRR610262, SRR610263 [9] |
| Rrp40                                | Rrp40      | SRA       | SRR610264, SRR610265 [9] |
| PR-Set7                              | PR-Set7    | modENCODE | modENCODE_3054           |
| Posterior sex combs                  | Psc        | GEO       | GSE24521 [3]             |
| RPD3                                 | RPD3       | modENCODE | modENCODE_3057           |
| dre4                                 | SPT16      | modENCODE | modENCODE_3058           |
| Suppressor of Hairy wing             | Su(Hw)     | modENCODE | modENCODE_330            |
| Suppressor of variegation 3-3        | Su(var)3-3 | modENCODE | modENCODE_3949           |
| Suppressor of variegation 3-7        | Su(var)3-7 | modENCODE | modENCODE_2672           |
| Suppressor of variegation 3-9        | Su(var)3-9 | modENCODE | modENCODE_2673           |
| Topoisomerase II                     | TopoII     | modENCODE | modENCODE_3945           |
| Trithorax-like                       | Trl        | modENCODE | modENCODE_285            |
| Trithorax-related                    | Trr        | SRA       | SRR585047 [5]            |
| Trithorax                            | Trx        | GEO       | GSE24521 [3]             |
| will die slowly                      | WDS        | modENCODE | modENCODE_953            |
| deformed wings                       | ZW5        | modENCODE | modENCODE_3804           |

†: unpublished data (manuscript in preparation).

## References

- [1] Kockmann,T., Gerstung,M., Schlumpf,T., Xhinzhou,Z., Hess,D., Beerenwinkel,N., Beisel,C. and Paro,R. (2013) The BET protein FSH functionally interacts with ASH1 to orchestrate global gene activity in *Drosophila*. *Genome Biol.*, in press
- [2] Sawarkar,R., Sievers,C. and Paro,R. (2012) Hsp90 globally targets paused RNA polymerase to regulate gene expression in response to environmental stimuli. *Cell*, **149**, 807-818.
- [3] Enderle,D., Beisel,C., Stadler,M.B., Gerstung,M. Athri,P. and Paro,R. (2011) Polycomb preferentially targets stalled promoters of coding and noncoding transcripts. *Genome Res.*, **21**, 216-226.
- [4] Schwaiger,M., Stadler,M.B., Bell,O., Kohler,H., Oakeley,E.J. and Schubeler,D. (2009) Chromatin state marks cell-type- and gender-specific replication of the *Drosophila* genome. *Genes Dev.*, **23**, 589-601.
- [5] Herz HM, Mohan M, Garruss AS, Liang K, Takahashi YH et al (2012) Enhancer-associated H3K4 monomethylation by Trithorax-related, the *Drosophila* homolog of mammalian Mll3/Mll4. *Genes Dev* 26(23): 2604-20.
- [6] Smith ER, Lin C, Garrett AS, Thornton J, Mohaghegh N et al (2011) The little elongation complex regulates small nuclear RNA transcription. *Mol Cell* 44(6): 954-965.
- [7] Guertin MJ, Lis JT (2010) Chromatin landscape dictates HSF binding to target DNA elements. *PLoS Genet* 6(9): e1001114.
- [8] Straub T, Zabel A, Gilfillan GD, Feller C, Becker PB (2013) Different chromatin interfaces of the *Drosophila* dosage compensation complex revealed by high-shear ChIP-seq. *Genome Res.* 23(3): 473-85.
- [9] Lim SJ, Boyle PJ, Chinen M, Dale RK, Lei EP (2013) Genome-wide localization of exosome components to active promoters and chromatin insulators in *Drosophila*. *Nucleic Acids Res* 41(5): 2963-2980.
