# Supplementary material for: Combinatorial Modeling of Chromatin Features Quantitatively Predicts DNA Replication Timing in Drosophila
Source: PubMed Central journal article supplement (PMC3900380; doi:10.1371/journal.pcbi.1003419), 2014-01-23
Supplement: pcbi.1003419.s015.pdf [file pcbi.1003419.s015.pdf]

Supporting Information for:  
 Combinatorial modeling of chromatin features quantitatively predicts  
 DNA replication timing in *Drosophila*  
 Table S3

Federico Comoglio and Renato Paro

| Symbol     | Source    | Identifier     |
|------------|-----------|----------------|
| H1         | modENCODE | modENCODE_3300 |
| H2Av       | modENCODE | modENCODE_2991 |
| H2BK5ac    | modENCODE | modENCODE_3283 |
| H2BUb      | modENCODE | modENCODE_290  |
| H3         | modENCODE | modENCODE_3301 |
| H3.3       | modENCODE | modENCODE_2528 |
| H3K4me1    | modENCODE | modENCODE_304  |
| H3K4me2    | modENCODE | modENCODE_2655 |
| H3K4me3    | modENCODE | modENCODE_305  |
| H3K9ac     | modENCODE | modENCODE_309  |
| H3K9acS10P | modENCODE | modENCODE_2660 |
| H3K9me1    | modENCODE | modENCODE_3770 |
| H3K9me2    | modENCODE | modENCODE_3011 |
| H3K9me3    | modENCODE | modENCODE_313  |
| H3K18ac    | modENCODE | modENCODE_292  |
| H3K23ac    | modENCODE | modENCODE_294  |
| H3K27ac    | modENCODE | modENCODE_296  |
| H3K27me1   | modENCODE | modENCODE_3943 |
| H3K27me2   | modENCODE | modENCODE_3000 |
| H3K27me3   | SRA       | SRR585053 [1]  |
| H3K36me1   | modENCODE | modENCODE_3170 |
| H3K36me3   | modENCODE | modENCODE_303  |
| H3K79me1   | modENCODE | modENCODE_2658 |
| H3K79me2   | modENCODE | modENCODE_307  |
| H4         | modENCODE | modENCODE_3304 |
| H4acTetra  | modENCODE | modENCODE_201  |
| H4K5ac     | modENCODE | modENCODE_321  |
| H4K8ac     | modENCODE | modENCODE_322  |
| H4K16ac    | modENCODE | modENCODE_320  |
| H4K20me    | modENCODE | modENCODE_3014 |

## References

- [1] Herz H-M, Mohan M, Garruss AS, Liang K, Takahashi Y et al. (2012) Enhancer-associated H3K4 monomethylation by Trithorax-related, the *Drosophila* homolog of mammalian Mll3/Mll4. *Genes Dev* 26: 2604-2620.
